# Supplementary material for: Preparation and Properties of Low-Dielectric Polyimide Films Containing Tert-Butyl
Source: MDPI journal article supplement (doi:10.3390/polym16070984), 2024-04-04
Supplement: s1 [file s1]

## Supporting Information

### Preparation and properties of low dielectric polyimide films containing tert-butyl

#### Supplementary figures

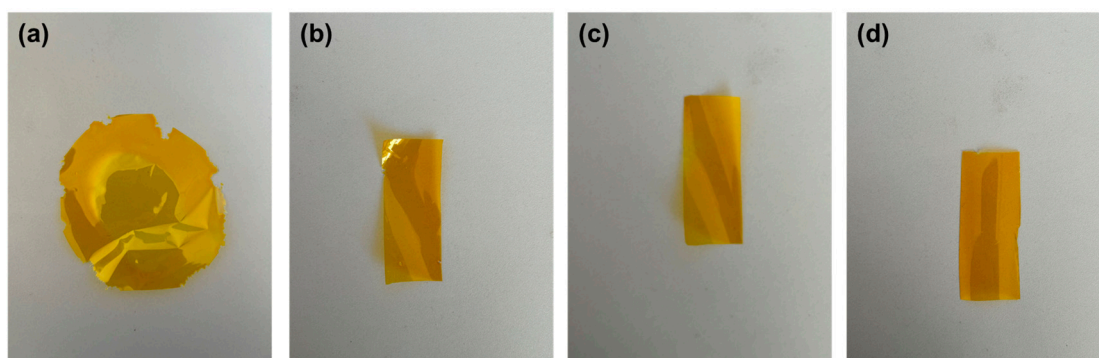

**Figure S1.** The picture of tert-butyl PI films. (a) PI-1. (b) PI-2. (c) PI-3. (d) PI-4.

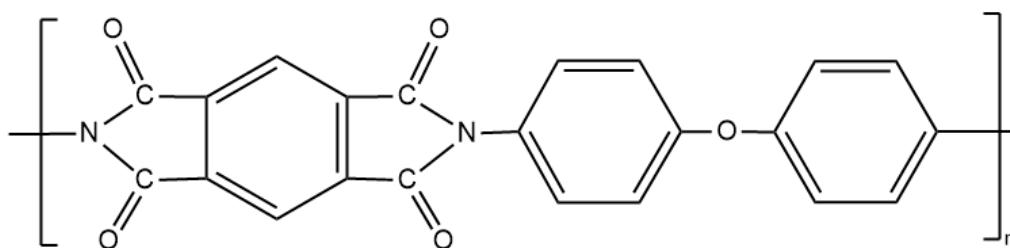

**Figure S2.** The chemical structure of PI-5 film

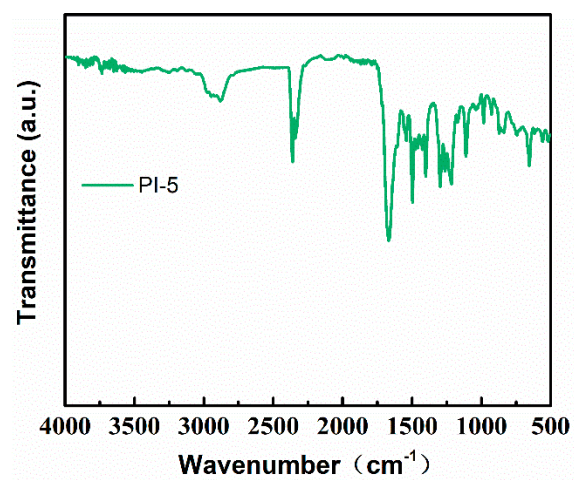

**Figure S3.** FT-IR spectrum of PI-5 film

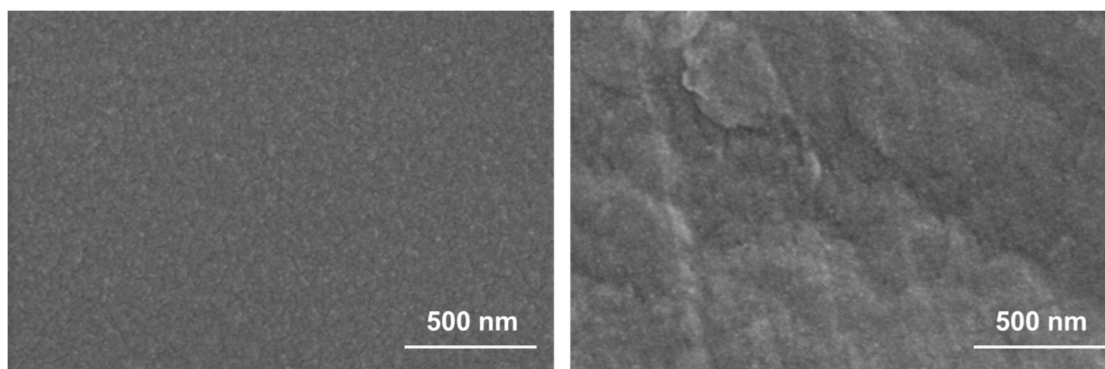

**Figure S4.** SEM image (a) and cross-sectional view (b) of PI-5 film

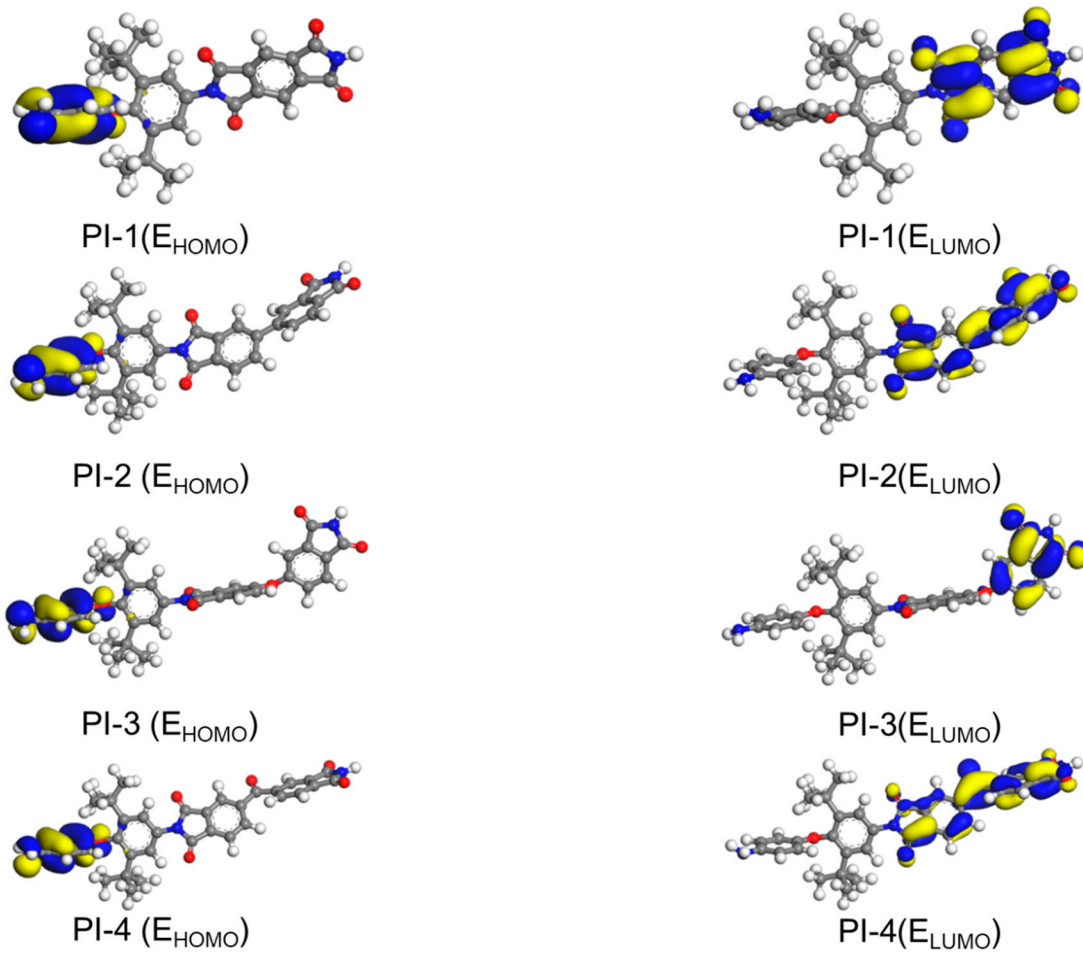

**Figure S5.** HOMO-LUMO orbitals of PI model molecules containing tert butyl group.

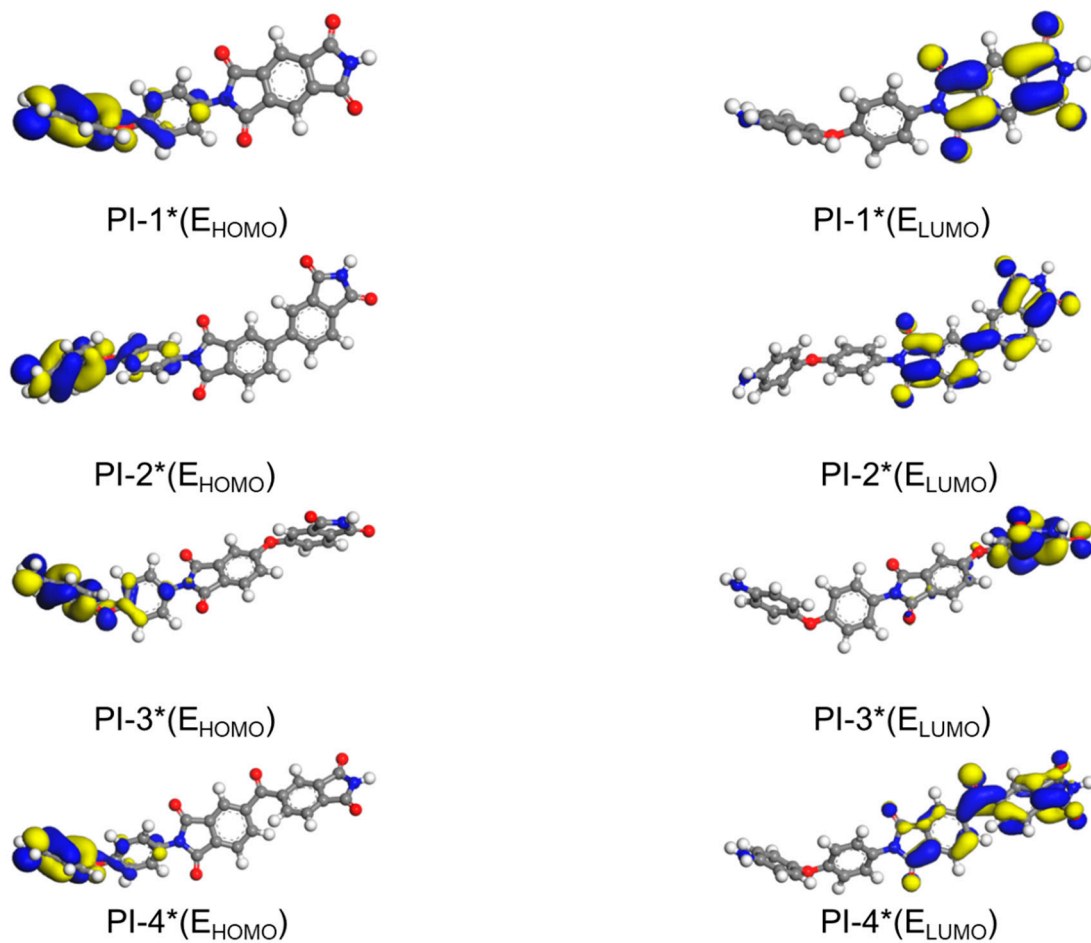

**Figure S6.** HOMO-LUMO orbitals of PI model molecules without tert butyl group

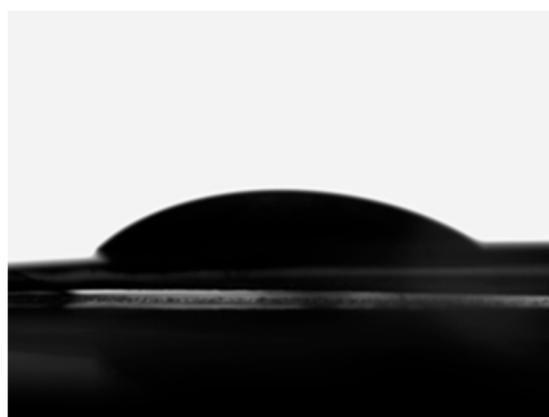

**Figure S7.** Water contact angle of PI-5 film

## Supplementary tables

**Table S1.** Performance comparison of PI film.

| Polymer code                                              | Dielectric constant | 5 wt% loss temperature (°C) | Tensile strength (MPa) | Maximum hydrophobic angle (°) | Reference                                                                                                            |
|-----------------------------------------------------------|---------------------|-----------------------------|------------------------|-------------------------------|----------------------------------------------------------------------------------------------------------------------|
| BPDA/PDA/TFDB <sup>[1]</sup>                              | 3.42                | --                          | 217.13                 | --                            | Composition design and properties investigation of BPDA/PDA/TFDB co-polyimide films with low dielectric permittivity |
| PI/GNR <sup>[2]</sup>                                     | 3.1                 | --                          | 166.7                  | 79                            | Dielectric and mechanical properties of polyimide composite films reinforced with graphene nanoribbon                |
| TiO <sub>2</sub> /PI three-layer composite <sup>[3]</sup> | 3.68                | --                          | 118                    | --                            | Dielectric and mechanical properties of TiO <sub>2</sub> /polyimide composites with low dielectric constant          |
| 0 wt% h-BN- GNP/PI <sup>[4]</sup>                         | 3.96                | 564.9                       | 48.53                  | --                            | Enhanced thermal conductivity of                                                                                     |

|                                      |      |       |         |       |  |                                                                                                                                                                         |
|--------------------------------------|------|-------|---------|-------|--|-------------------------------------------------------------------------------------------------------------------------------------------------------------------------|
|                                      |      |       |         |       |  | polyimide composite film filled with hybrid fillers                                                                                                                     |
|                                      |      |       |         |       |  | Improved mechanical, thermal properties and ideal dielectric properties of polyimide composite films by incorporation of boron nitride nanosheets and aramid nanofibers |
| PI/2wt%BNNS/ANFs <sup>[5]</sup>      | 3.73 | 527.1 | 110.60  | --    |  | Breaking the mutual restraint between low permittivity and low thermal expansion in polyimide films via a branched crosslink structure                                  |
| BPDA/PDA/TAPOB-PI-0.1 <sup>[6]</sup> | 3.12 | --    | 362.2   | --    |  |                                                                                                                                                                         |
| The optimized tert-butyl PI-4        | 2.9  | 454   | 117.399 | 80.16 |  | This work                                                                                                                                                               |

Notes: -- means that the data is unavailable.

## Reference

- [1] X.L. Li, H.Y. Lei, J.C. Guo, J.H. Wang, S.L. Qi, G.F. Tian, D.Z. Wu, Composition design and properties investigation of BPDA/PDA/TFDB co-polyimide films with low dielectric permittivity, Journal of Applied Polymer Science, 136 (2019).

- [2] X. Liu, Y. Li, W. Guo, X. Sun, Y. Feng, D. Sun, Y. Liu, K. Yan, Z. Wu, B. Su, J. Yin, Dielectric and mechanical properties of polyimide composite films reinforced with graphene nanoribbon, *Surface and Coatings Technology*, 320 (2017) 497-502.
- [3] G. Zhao, X. Mu, D. Ma, S. Wang, J. Pan, J. Cui, M. Qi, Dielectric and mechanical properties of TiO<sub>2</sub>/polyimide composites with low dielectric constant, *Polymer Engineering & Science*, 63 (2023) 1953-1960.
- [4] R.Y. Li, C.C. Ding, J. Yu, X.D. Wang, P. Huang, Enhanced thermal conductivity of polyimide composite film filled with hybrid fillers, *High Performance Polymers*, 33 (2021) 905-913.
- [5] T. Zhang, Y.W. Huang, Y. Sun, P.P. Tang, C.Y. Hu, Improved mechanical, thermal properties and ideal dielectric properties of polyimide composite films by incorporation of boron nitride nanosheets and aramid nanofibers, *Polymers for Advanced Technologies*, 33 (2022) 2123-2136.
- [6] H. Zhou, H. Lei, J. Wang, S. Qi, G. Tian, D. Wu, Breaking the mutual restraint between low permittivity and low thermal expansion in polyimide films via a branched crosslink structure, *Polymer*, 162 (2019) 116-120.
